# Supplementary material for: Development of efficient bi-functional g-C3N4@MOF heterojunctions for water splitting
Source: Royal Society of Chemistry journal article supplement (doi:10.1039/d2ra05594e), 2022-01-01
Supplement: d2ra05594e1.pdf [file d2ra05594e1.pdf]

## Development of Efficient Bi-functional $g\text{-C}_3\text{N}_4\text{@MOFs}$ Heterojunction for Water Splitting

Muhammad Fiaz,<sup>a</sup> Nkenku Carl,<sup>b</sup> Muhammad Kashif,<sup>a</sup> Muhammad Asim Farid,<sup>c</sup> Nagina Naveed Riaz<sup>c</sup> and Muhammad Athar<sup>a\*</sup>

<sup>a</sup> Institute of Chemical Sciences, Bahauddin Zakariya University, Multan, 60800, Pakistan

<sup>b</sup> Department of Energy Systems Research, Ajou University, Suwon, 16499, South Korea

<sup>c</sup> Department of Chemistry, Division of Science and Technology, University of Education Lahore, Pakistan

\*corresponding Author: [athar.qr@bzu.edu.pk](mailto:athar.qr@bzu.edu.pk)

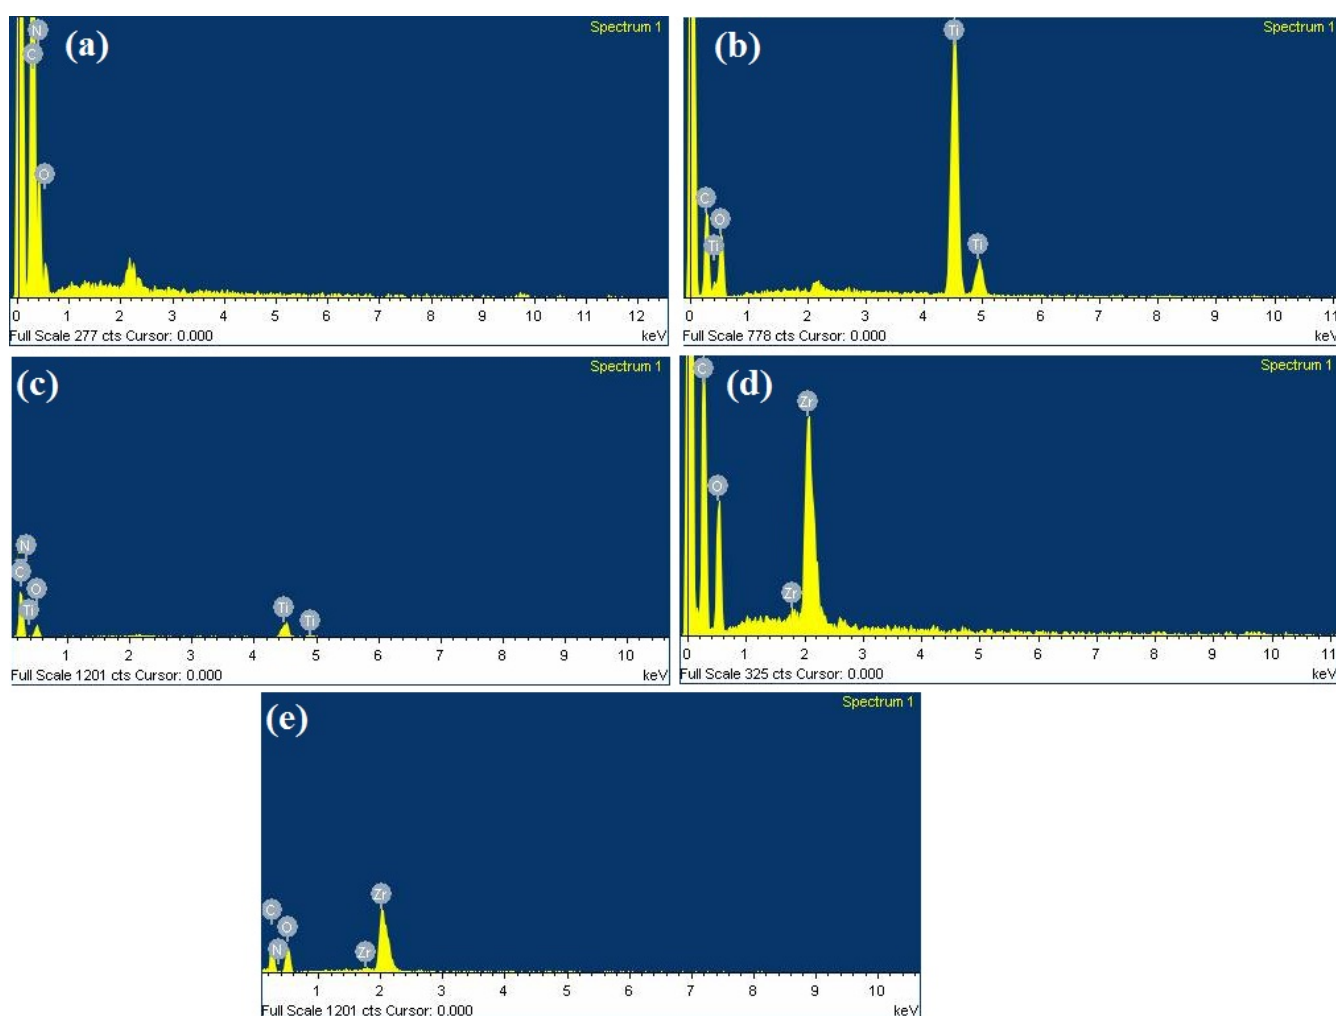

**Figure S1:** SEM based EDX of (a)  $g\text{-C}_3\text{N}_4$ , (b) MIL-125 (Ti), (c)  $g\text{-C}_3\text{N}_4\text{@MIL-125}$  (Ti), (d) UiO-66, (e)  $g\text{-C}_3\text{N}_4\text{@UiO-66}$

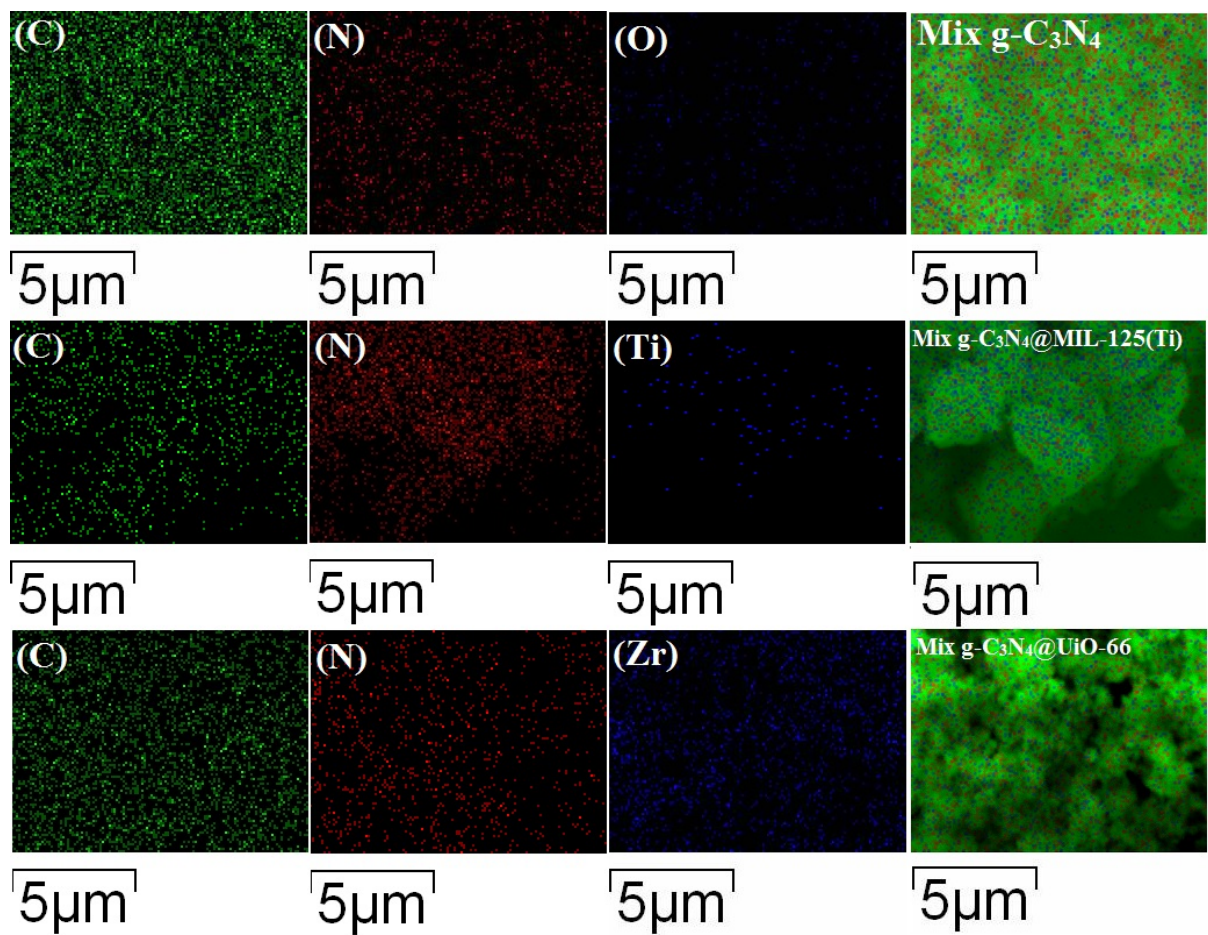

**Figure S2:** SEM based Elemental mapping of g-C<sub>3</sub>N<sub>4</sub>, g-C<sub>3</sub>N<sub>4</sub>@MIL-125 (Ti) and g-C<sub>3</sub>N<sub>4</sub>@UiO-66

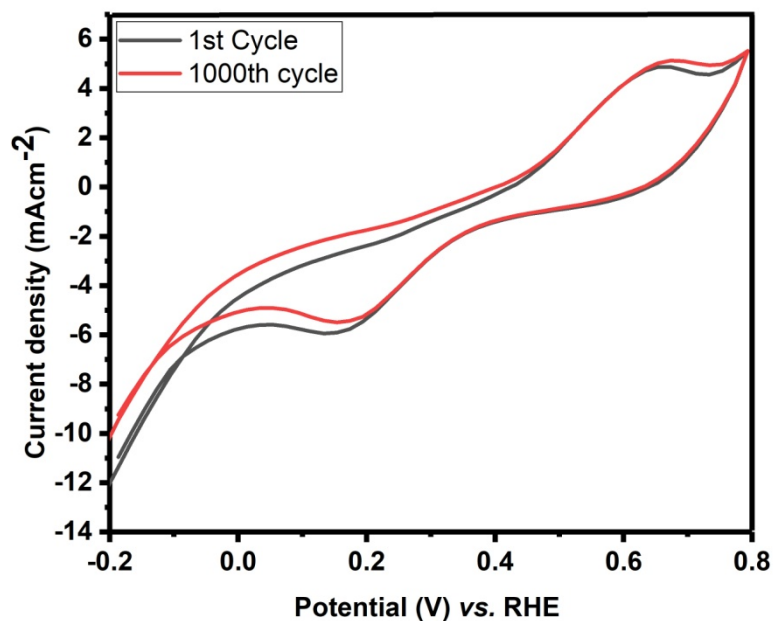

**Figure S3:** CV curves at 100 mVs<sup>-1</sup> for 1<sup>st</sup> and 1000<sup>th</sup> cycle of g-C<sub>3</sub>N<sub>4</sub>@MIL-125 (Ti)

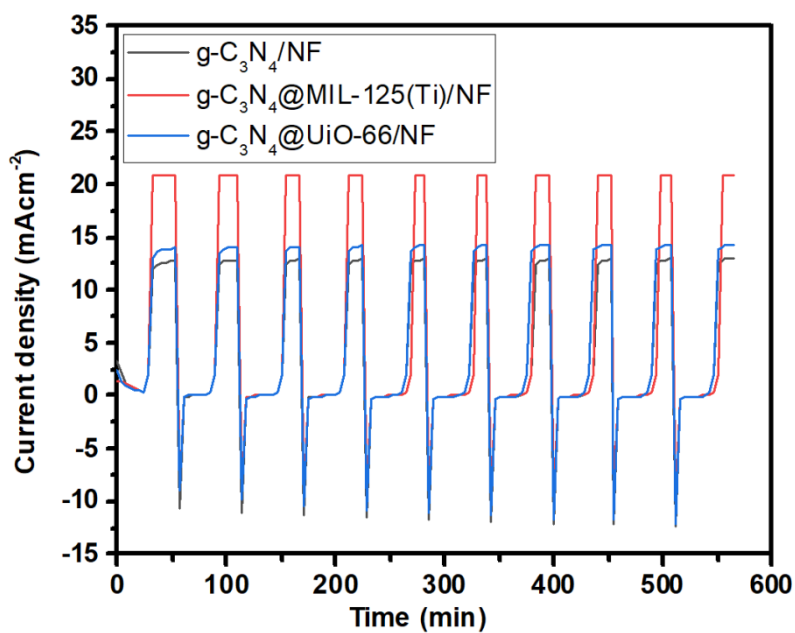

**Figure S4:** Chronoamperometric measurements at 1.5 V potential for g-C<sub>3</sub>N<sub>4</sub>, g-C<sub>3</sub>N<sub>4</sub>@MIL-125 (Ti) and g-C<sub>3</sub>N<sub>4</sub>@UiO-66
